# Supplementary material
Source: publisher site journal article supplement (https://www.dovepress.com/article/237038)
Supplement: Supplementary file 1 [file get_supplementary_file.php]

# TEMPLATE INSTRUCTIONS

1. It is not compulsory to fill in the template if additional documentation is provided that clearly indicates the answers to the questions required in it.

2. This google sheet document has been developed as part of the ARDIG project to make an inventory of national surveillance & monitoring systems on antimicrobial sales/usage (AMU) and antimicrobial resistance (AMR) in humans, animals and food in national level through 6 different countries (Spain, Netherlands, France, United Kindom, Norway and Germany).

3. The template is formed mainly by 9 sheets which can be viewed in the bottom part as tabs:

|                                                 |                                                                                                                                                                                                                                                                                                                                                                                                                                                                                        |
|-------------------------------------------------|----------------------------------------------------------------------------------------------------------------------------------------------------------------------------------------------------------------------------------------------------------------------------------------------------------------------------------------------------------------------------------------------------------------------------------------------------------------------------------------|
| <a href="#">Starting sheet:</a>                 | It is the current one and gives some instructions to fill the whole template.                                                                                                                                                                                                                                                                                                                                                                                                          |
| <a href="#">Humans-AMU:</a>                     | This sheet collects general data about antibiotic use in humans. This sheet is structured in such a way that the information from a data collection system can be added. If the country has more than one system, you must duplicate the sheet (click left mouse button on the "Humans" tab and click on duplicate) as many times as you have systems, collecting the information of each system in a different sheet.                                                                 |
| <a href="#">Humans-AMR:</a>                     | This sheet collects general data about antimicrobial resistance in humans. This sheet is structured in such a way that the information from a data collection system (Surveillance, Monitoring, Screening) can be added. If the country has more than one system, you must duplicate the sheet (click left mouse button on the "Humans" tab and click on duplicate) as many times as you have systems, collecting the information of each system in a different sheet.                 |
| <a href="#">Animals-AMU:</a>                    | This sheet collects general data about antimicrobial sales/usage (AMU) use in animals. This sheet is structured in such a way that the information from a data collection system can be added. If the country has more than one system, you must duplicate the sheet (click left mouse button on the "Animals" tab and click on duplicate) as many times as you have systems, attaching the information of each system in a different sheet.                                           |
| <a href="#">Animals-AMR:</a>                    | This sheet collects general data about antimicrobial resistance (AMR) in animals. This sheet is structured in such a way that the information from a data collection system (Surveillance, monitoring, clinical isolates) can be added. If the country has more than one system, you must duplicate the sheet (click left mouse button on the "Animals" tab and click on duplicate) as many times as you have systems, collecting the information of each system in a different sheet. |
| <a href="#">Food:</a>                           | This sheet collects available data of food isolates (including retail). Years (separated by commas) for which data on a pathogen are available in a food matrix should be noted in this table. Other food matrixes and pathogens may be added to the table if it is considered interesting.                                                                                                                                                                                            |
| <a href="#">Panel Bacteria / Antimicrobial:</a> | One table like this must be completed for each system on AMR. Other bacteria and antibiotics may be added to the table if it is considered interesting.                                                                                                                                                                                                                                                                                                                                |
| <a href="#">Bacteria / Animal population:</a>   | Years (separated by commas) for which data on a pathogen are available in a population type should be noted in this table. Other bacteria may be added to the table if it is considered interesting.                                                                                                                                                                                                                                                                                   |
| <a href="#">Population / Year</a>               | One table like this must be completed for each system on AMU.                                                                                                                                                                                                                                                                                                                                                                                                                          |

4. Please, send the template back as soon as it is filled.

\*Short vocabulary lists have been used to facilitate the work of filling in but more can be added if necessary. Specifically, the list of antibiotics is based on the WHO AGISAR recommendation.

## Antimicrobial use / Consumption data / Sales data in humans

| Information required                                                                          | Availability of data | Comments | Data |
|-----------------------------------------------------------------------------------------------|----------------------|----------|------|
| Database system name                                                                          |                      |          |      |
| Database system acronym                                                                       |                      |          |      |
| Type of system (Surveillance, Screening, Monitoring)                                          |                      |          |      |
| Which country does the data come from?                                                        |                      |          |      |
| Which is the data source?                                                                     |                      |          |      |
| Which is the organisation in charge of the database system?                                   |                      |          |      |
| Who is the funding organisation?                                                              |                      |          |      |
| Who is the contact person in the organisation?                                                |                      |          |      |
| Type of data level provided in the database                                                   |                      |          |      |
| Is continuous data from 2014 to 2017 available? If not please provide information on changes! | Yes                  |          |      |
| At which level is the antimicrobial information available?                                    |                      |          |      |
| Unit of measurement (ATC/DDD). If other unit is used, please comment it                       | Yes                  |          |      |
| Is there a protocol description? If 'Yes', please send it.                                    | Yes                  |          |      |
| Is the administration route available?                                                        | Yes                  |          |      |

## Antimicrobial resistance data in humans

| Information required                                                                                                                              | Availability of data | Comments | Data                                           |
|---------------------------------------------------------------------------------------------------------------------------------------------------|----------------------|----------|------------------------------------------------|
| Type of data level provided in the database                                                                                                       | Line level           |          |                                                |
| Database system name                                                                                                                              |                      |          |                                                |
| Database system acronym                                                                                                                           |                      |          |                                                |
| Type of system (Surveillance, Monitoring, Screening)                                                                                              |                      |          |                                                |
| Which country does the data come from?                                                                                                            |                      |          |                                                |
| Which is the data source?                                                                                                                         |                      |          |                                                |
| Which is the organisation in charge of the database system?                                                                                       |                      |          |                                                |
| Who is the contact person in the organisation?                                                                                                    |                      |          |                                                |
| Is continuous data from 2014 to 2017 available? If not please provide information on changes!                                                     | Yes                  |          |                                                |
| Is variable "Age" available?                                                                                                                      | Yes                  |          |                                                |
| Is variable "Gender" available?                                                                                                                   | Yes                  |          |                                                |
| Is denominator data available?                                                                                                                    | Yes                  |          |                                                |
| Is specimen type data available?                                                                                                                  | Yes                  |          |                                                |
| Where do the data come from? (Laboratory or hospital)                                                                                             |                      |          |                                                |
| Does the database provide information on the hospital type (primary, secondary, tertiary, specialised) where samples were collected?              | Yes                  |          |                                                |
| Are subsets of medical specialities available in the database?                                                                                    | Yes                  |          |                                                |
| Is there any system to avoid isolate duplication? If "Yes" please provide a description                                                           | Yes                  |          |                                                |
| Data from Community - Medical practice (Sampling point)                                                                                           | Yes                  |          |                                                |
| Data from Hospital-Ambulatory (Sampling point)                                                                                                    | Yes                  |          |                                                |
| Data from Hospital-Inpatient (Sampling point)                                                                                                     | Yes                  |          |                                                |
| Data from Hospital-ICU (Sampling point)                                                                                                           | Yes                  |          |                                                |
| Which antibiotic test method is used?                                                                                                             | Yes                  |          |                                                |
| Is the antibiotic test method the same for all isolates in the dataset? If not, please comment.                                                   | Yes                  |          |                                                |
| Are quantitative test results provided?                                                                                                           | Yes                  |          |                                                |
| Are qualitative test results provided?                                                                                                            |                      |          |                                                |
| Are cut-offs of qualitative test results available?                                                                                               | Yes                  |          |                                                |
| Is there a fixed antibiotic panel (Standard) for each bacterium?                                                                                  | Yes                  |          |                                                |
| Panel of Antibiotics vs Bacteria. Use one table per system (fill only those bacteria with more than 30 isolates available in the system database) | Yes                  |          | <a href="#">Panel_Bacteria / Antimicrobial</a> |
| Is there a protocol description? If "Yes", please send it.                                                                                        | Yes                  |          |                                                |
| How many hospitals/practices are roughly participating?                                                                                           | Yes                  |          |                                                |
| How many labs are participating per year?                                                                                                         | Yes                  |          |                                                |
| Is there an external quality assurance (EQA) system in place?                                                                                     | Yes                  |          |                                                |
| Type of standard used. If "other" please explain in the comment field                                                                             | Yes                  |          |                                                |

## Antimicrobial use / Consumption data / Sales data in animals

| Information required                                                                          | Availability of data | Comments | Data                              |
|-----------------------------------------------------------------------------------------------|----------------------|----------|-----------------------------------|
| Database system name                                                                          |                      |          |                                   |
| Database system acronym                                                                       |                      |          |                                   |
| Type of system                                                                                |                      |          |                                   |
| Which country does the data come from?                                                        |                      |          |                                   |
| Which is the organisation in charge of the database system?                                   |                      |          |                                   |
| Who is the funding organisation?                                                              |                      |          |                                   |
| Who is the contact person in the organisation?                                                |                      |          |                                   |
| Type of data level provided in the database                                                   |                      |          |                                   |
| Is continuous data from 2014 to 2017 available? If not please provide information on changes! | Yes                  |          |                                   |
| At which level is the antimicrobial information available?                                    |                      |          |                                   |
| Describe the unit of measurement and how it has been calculated                               |                      |          |                                   |
| Is there a protocol description? If 'Yes', please send it.                                    | Yes                  |          |                                   |
| Is information by animal species and subpopulation (e.g. calves vs. dairy cows) available?    | Yes                  |          |                                   |
| Do you have data on population vs year listed in the following table?                         |                      |          | <a href="#">Population / Year</a> |
| Is dosage available?                                                                          | Yes                  |          |                                   |
| Is the purpose of antimicrobial use available?                                                | Yes                  |          |                                   |
| Is the administration route available?                                                        | Yes                  |          |                                   |

## Antimicrobial resistance data in animals

| Information required                                                                                                    | Availability of data | Comments | Data                                           |
|-------------------------------------------------------------------------------------------------------------------------|----------------------|----------|------------------------------------------------|
| Type of data level provided in the database                                                                             |                      |          |                                                |
| Database system name                                                                                                    |                      |          |                                                |
| Database system acronym                                                                                                 |                      |          |                                                |
| Type of system                                                                                                          |                      |          |                                                |
| Which country does the data come from?                                                                                  |                      |          |                                                |
| Which is the organisation in charge of the database system?                                                             |                      |          |                                                |
| Who is the contact person in the organisation?                                                                          |                      |          |                                                |
| Is continuous data from 2014 to 2017 available? If not please provide information on changes!                           | Yes                  |          |                                                |
| Is there a protocol description? If 'Yes', please send it.                                                              | Yes                  |          |                                                |
| Panel of Antibiotics vs Bacteria. Use one table per Lab (fill only those bacteria with more than 30 isolates available) | Yes                  |          | <a href="#">Panel_Bacteria / Antimicrobial</a> |
| How many clinical isolates are collected per healthy animal sample?                                                     | Yes                  |          |                                                |
| Is information on Sample material available?                                                                            | Yes                  |          |                                                |
| How many isolates are collected in the country?                                                                         | Yes                  |          |                                                |
| Is there a fixed antibiotic panel (Standard) for each bacterium?                                                        | Yes                  |          |                                                |
| Is sampling strategy available?                                                                                         | Yes                  |          |                                                |
| Protocol of sample collection                                                                                           | Yes                  |          |                                                |
| Sample size                                                                                                             | Yes                  |          |                                                |
| Which is the place of sampling / sampling point?if several, please comment it                                           | Yes                  |          |                                                |
| Sampling plan                                                                                                           | Yes                  |          |                                                |
| Which antibiotic test method is used?                                                                                   | Yes                  |          |                                                |
| Is the antibiotic test method the same for all?                                                                         | Yes                  |          |                                                |
| Are quantitative test results provided?                                                                                 | Yes                  |          |                                                |
| Are quantitative test results provided?                                                                                 | Yes                  |          |                                                |
| Are cut-offs of qualitative test results available?                                                                     | Yes                  |          |                                                |
| Prevalence of resistance in bacteria from target population (denominator: isolate)                                      | Yes                  |          |                                                |
| Prevalence of resistant bacteria in target population (denominator: sample)                                             | Yes                  |          |                                                |
| What kind of study on consumption of antimicrobial agents by animal species has been applied?                           | Yes                  |          |                                                |
| Is the type of disease for which the clinical isolate was taken available?                                              | Yes                  |          |                                                |
| How many labs are participating per year?                                                                               | Yes                  |          |                                                |
| Are ring trials done between labs?                                                                                      | Yes                  |          |                                                |
| Is a quality assurance system in place available?                                                                       | Yes                  |          |                                                |
| Type of standard used. If "other" please explain in the comment field                                                   | Yes                  |          |                                                |

| <i>Food/Bacteria</i> | <i>E.Coli</i> | <i>MRSA</i> | <i>Salmonella</i> | <i>Enterococcus</i> | <i>Campylobacter</i> |  |
|----------------------|---------------|-------------|-------------------|---------------------|----------------------|--|
| Legumes              |               |             |                   |                     |                      |  |
| Fruit                |               |             |                   |                     |                      |  |
| Milk                 |               |             |                   |                     |                      |  |
| Eggs                 |               |             |                   |                     |                      |  |
| Turkey meat          |               |             |                   |                     |                      |  |
| Broilers meat        |               |             |                   |                     |                      |  |
| Pig meat             |               |             |                   |                     |                      |  |
| Cattle meat          |               |             |                   |                     |                      |  |
| Veal meat            |               |             |                   |                     |                      |  |
| Sheep meat           |               |             |                   |                     |                      |  |
| Goat meat            |               |             |                   |                     |                      |  |
| Cereals              |               |             |                   |                     |                      |  |
| Seafood              |               |             |                   |                     |                      |  |
|                      |               |             |                   |                     |                      |  |
|                      |               |             |                   |                     |                      |  |







## System name:

| <i>Population / Year</i>                                         | <i>2014</i> | <i>2015</i> | <i>2016</i> | <i>2017</i> |
|------------------------------------------------------------------|-------------|-------------|-------------|-------------|
| Cattle (bovine animals) - calves (under 1 year)                  |             |             |             |             |
| Cattle (bovine animals) - dairy cows                             |             |             |             |             |
| Cattle (bovine animals) - meat production animals                |             |             |             |             |
| Cattle (bovine animals) - meat production animals - suckler cows |             |             |             |             |
| Cattle (bovine animals) - unspecified                            |             |             |             |             |
| Gallus gallus (fowl) - broilers                                  |             |             |             |             |
| Gallus gallus (fowl) - broilers - unspecified                    |             |             |             |             |
| Gallus gallus (fowl) - laying hens                               |             |             |             |             |
| Gallus gallus (fowl) - unspecified                               |             |             |             |             |
| Pigs                                                             |             |             |             |             |
| Pigs - breeding animals                                          |             |             |             |             |
| Pigs - fattening pigs                                            |             |             |             |             |
| Pigs - unspecified                                               |             |             |             |             |
| Turkeys - unspecified                                            |             |             |             |             |
| Turkeys - fattening flocks                                       |             |             |             |             |
| Turkeys - breeding flocks, unspecified                           |             |             |             |             |
